# Supplementary material for: A multi-detector chromatographic approach for characterization and quantitation of botanical constituents to enable in silico safety assessments
Source: PubMed Central journal article supplement (PMC6061755; doi:10.1007/s00216-018-1163-y), 2018-07-11
Supplement: 216_2018_1163_MOESM1_ESM.pdf [file 216_2018_1163_MOESM1_ESM.pdf]

**Analytical and Bioanalytical Chemistry**

**Electronic Supplementary Material**

**A multi-detector chromatographic approach for characterization and quantitation of botanical constituents to enable in silico safety assessments**

Timothy R. Baker, Brian T. Regg

**Table S1** Proposed identifications of the 83 CAD peaks observed during the analysis of the Spectrum Ginkgo extract

| CAD Peak number | RT (min.) | +/- ion mode | Mass Accuracy (Score)           | Proposed ID (CAS #)      | Molecular Formula                                            | CAD % | Structure                                                                            | Comments                                                                                                                                                                                                                                                                                                                    | MS/MS Product Ions (m/z). Precursor not listed               |
|-----------------|-----------|--------------|---------------------------------|--------------------------|--------------------------------------------------------------|-------|--------------------------------------------------------------------------------------|-----------------------------------------------------------------------------------------------------------------------------------------------------------------------------------------------------------------------------------------------------------------------------------------------------------------------------|--------------------------------------------------------------|
| 1               | 0.94      | Pos          | -1.3 ppm (100)<br>-0.1 ppm (99) | Magnesium                | Mg <sup>2+</sup>                                             | 1.2 % |                                                                                      | Magnesium clusters with acetonitrile and formic acid in positive ion mode and Magnesium clusters with formic acid in negative ion mode. Example here is [MgFm+2ACN] <sup>+</sup> . MgFm2 repeat has a mass difference of 113.98043. In negative ion, example is [Mg+3Fm] <sup>-</sup> . Isotope pattern consistent with Mg. |                                                              |
| 2               | 1.00      | Pos          | -1.8 ppm (100)                  | Choline (67-48-1)        | C <sub>5</sub> H <sub>14</sub> N <sub>1</sub> O <sub>1</sub> | 3.1 % | 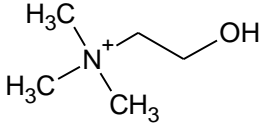  | RT, UV and MS/MS spectra consistent with authentic standard. 193                                                                                                                                                                                                                                                            | 60.0810 (+)<br>58.0654<br>45.0336                            |
| 3               | 1.10      | Pos          | 0.1 ppm (88)                    | Trigonelline (6138-41-6) | C <sub>7</sub> H <sub>7</sub> N <sub>1</sub> O <sub>2</sub>  | 4.1 % |  | RT, UV and MS/MS spectra consistent with authentic standard.                                                                                                                                                                                                                                                                | 110.0601 (+)<br>94.0632<br>92.0498<br>78.0342                |
|                 |           | Pos          | -1.8 ppm (88)                   | L-Proline (147-85-3)     | C <sub>5</sub> H <sub>9</sub> N <sub>1</sub> O <sub>2</sub>  |       |                                                                                      |                                                                                                                                                                                                                                                                                                                             | RT, UV and MS/MS spectra consistent with authentic standard. |

|  |  |     |                   |                          |                   |                                                                                      |                                                              |                                                           |
|--|--|-----|-------------------|--------------------------|-------------------|--------------------------------------------------------------------------------------|--------------------------------------------------------------|-----------------------------------------------------------|
|  |  |     |                   |                          |                   | 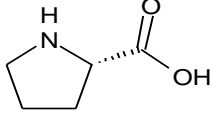  |                                                              |                                                           |
|  |  | Pos | -1.8 ppm<br>(100) | L-Valine<br>(72-18-4)    | $C_5H_{11}N_1O_2$ |   | RT, UV and MS/MS spectra consistent with authentic standard. | 72.0808 (+)<br>55.0540                                    |
|  |  | Neg | 1.9 ppm<br>(98)   | Mannitol<br>(69-65-8)    | $C_6H_{14}O_6$    |   | RT, UV and MS/MS spectra consistent with authentic standard. | 163.0599 (-)<br>101.0239<br>89.0245<br>71.0138<br>59.0142 |
|  |  | Neg | 0.8 ppm<br>(96)   | Quinic Acid<br>(77-95-2) | $C_7H_{12}O_6$    |  | RT, UV and MS/MS spectra consistent with authentic standard. | 127.0405 (-)<br>93.0351<br>85.0299<br>59.0142             |

|   |      |         |                                           |                                                |                      |       |                                                                                       |                                                              |                                                              |
|---|------|---------|-------------------------------------------|------------------------------------------------|----------------------|-------|---------------------------------------------------------------------------------------|--------------------------------------------------------------|--------------------------------------------------------------|
| 4 | 1.23 | Pos     | 0.6 ppm<br>(98)                           | Ginkgotoxin-<br>5-O-glucoside<br>(323579-25-5) | $C_{15}H_{23}N_1O_8$ | 5.6%  | 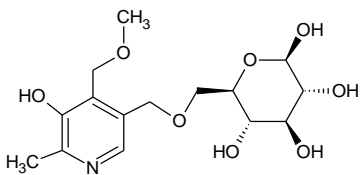   | MS/MS indicates hexose and is consistent with structure.     | 314.1234 (+)<br>184.0969<br>152.0704<br>136.0755<br>108.0808 |
|   |      | Neg     | 0.3 ppm<br>(100)                          | Unknown                                        | $C_7H_{12}O_5$       |       | ?                                                                                     | Unknown, but probably similar to Quinic acid (less oxygen).  | 129.0557 (-)<br>111.0153<br>95.0504<br>73.0297               |
| 5 | 4.88 | Pos/Neg | -0.5 ppm<br>(95)<br><br>0.9 ppm<br>(100)  | Protocatechuic<br>Acid<br>(99-50-3)            | $C_7H_6O_4$          | 0.7%  |   | RT, UV and MS/MS spectra consistent with authentic standard. | 109.0296 (-)                                                 |
| 6 | 7.14 | Pos/Neg | -0.6 ppm<br>(100)<br><br>0.4 ppm<br>(100) | Xanthurenic Acid<br>(59-00-7)                  | $C_{10}H_7N_1O_4$    | 0.2 % |  | RT, UV and MS/MS spectra consistent with authentic standard. | 188.0341 (+)<br>178.0497<br>160.0392<br>132.0442<br>104.0491 |

|   |       |         |                                       |                              |                      |       |                                                                                      |                                                                                                 |                                                              |
|---|-------|---------|---------------------------------------|------------------------------|----------------------|-------|--------------------------------------------------------------------------------------|-------------------------------------------------------------------------------------------------|--------------------------------------------------------------|
| 7 | 8.44  | Pos/Neg | 0.1 ppm<br>(99)<br>-0.4 ppm<br>(100)  | Unknown                      | $C_{16}H_{24}O_9$    | 0.6%  | ?                                                                                    | Observed as $[M+NH_4]^+$ in positive ion mode and $[M+ \text{Formate}]^-$ in negative ion mode. | 204.0304 (-)<br>160.0400                                     |
|   |       | Pos     | -1.0 ppm<br>(98)                      | L-Tryptophan<br>(73-22-3)    | $C_{11}H_{12}N_2O_2$ |       | 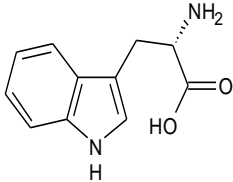  | RT, UV and MS/MS spectra consistent with authentic standard.                                    | 188.0709 (+)<br>159.0918<br>146.0601<br>118.0653             |
| 8 | 10.39 | Pos     | -0.6 ppm<br>(98)                      | Caffeine<br>(58-08-2)        | $C_8H_{10}N_4O_2$    | 0.3 % |                                                                                      | RT, UV and MS/MS spectra consistent with authentic standard.                                    | 138.0664 (+)<br>110.0713<br>69.0447<br>42.0432               |
| 9 | 11.18 | Pos/Neg | -0.3 ppm<br>(99)<br>-0.2 ppm<br>(100) | Gallocatechin<br>(3371-27-5) | $C_{15}H_{14}O_7$    | 3.4 % |  | RT, UV and MS/MS spectra consistent with authentic standard.                                    | 261.0768 (-)<br>219.0661<br>179.0348<br>165.0189<br>125.0241 |

|    |       |         |                                       |                             |                   |       |                                                                                       |                                                                 |                                                              |
|----|-------|---------|---------------------------------------|-----------------------------|-------------------|-------|---------------------------------------------------------------------------------------|-----------------------------------------------------------------|--------------------------------------------------------------|
|    |       | Pos/Neg | 0.6 ppm<br>(100)                      | Hydroxy-<br>benzaldehyde    | $C_7H_6O_2$       |       | 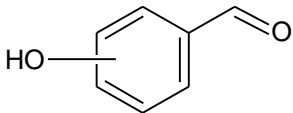   | MS/MS spectrum suggests<br>Hydroxybenzaldehyde                  | 92.0267(-)<br>65.0397                                        |
|    |       |         | 0.3 ppm<br>(100)                      |                             |                   |       |                                                                                       |                                                                 |                                                              |
| 10 | 11.76 | Neg     | 0.1 ppm<br>(100)                      | Vanillic Acid<br>(121-34-6) | $C_8H_8O_4$       | 0.3 % |    | RT, UV and MS/MS spectra<br>consistent with authentic standard. | 152.0113 (-)<br>123.0451<br>108.0217<br>95.0140              |
|    |       | Neg     | 0.6 ppm<br>(87)                       | Esculetin<br>(305-01-1)     | $C_9H_6O_4$       |       |    | RT, UV and MS/MS spectra<br>consistent with authentic standard. | 149.0240 (-)<br>133.0295<br>105.0346<br>89.0398<br>77.0398   |
|    |       | Pos/Neg | -0.8 ppm<br>(100)<br>0.1 ppm<br>(100) | Catechin<br>(7295-85-4)     | $C_{15}H_{14}O_6$ |       |  | RT, UV and MS/MS spectra<br>consistent with authentic standard. | 249.0760 (+)<br>207.0653<br>165.0546<br>139.0390<br>123.0441 |

|    |       |         |                                       |                                               |                      |       |                                                                                     |                                                                                                                                   |                                                              |
|----|-------|---------|---------------------------------------|-----------------------------------------------|----------------------|-------|-------------------------------------------------------------------------------------|-----------------------------------------------------------------------------------------------------------------------------------|--------------------------------------------------------------|
|    |       | Neg     | 0.5 ppm<br>(100)                      | Salicylic Acid<br>(69-72-7)                   | $C_7H_6O_3$          |       | 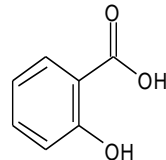 | RT, UV and MS/MS spectra<br>consistent with authentic standard.                                                                   | 93.0349 (-)<br>65.0397                                       |
|    |       | Pos/Neg | -0.5 ppm<br>(97)<br>-0.4 ppm<br>(100) | Quercetin with 2<br>glucose and 1<br>rhamnose | $C_{39}H_{50}O_{25}$ |       |  | MS/MS shows losses of glucose<br>and rhamnose.                                                                                    | 757.1968 (+)<br>611.1613<br>465.1028<br>309.0971<br>147.0440 |
| 11 | 12.95 | Pos/Neg | -0.6 ppm<br>(99)<br>-0.3 ppm<br>(99)  | Unknown                                       | $C_{19}H_{28}O_{11}$ | 0.3 % | ?                                                                                   | Observed as $[M+NH_4]^+$ in positive<br>ion mode and $[M+ Formate]^-$ in<br>negative ion mode. MS/MS<br>indicates hexose present. | 431.1561 (-)<br>269.1030<br>161.0460<br>101.0245             |
| 12 | 13.43 | Pos/Neg | -0.2 ppm<br>(99)<br>-0.7 ppm<br>(99)  | Unknown                                       | $C_{32}H_{44}O_{17}$ | 0.7 % | ?                                                                                   | Observed as $[M+NH_4]^+$ in positive<br>ion mode and $[M+ Formate]^-$ in<br>negative ion mode. MS/MS<br>indicates hexose present. | 699.2510 (-)<br>537.1978<br>375.1446<br>195.0667<br>179.0719 |

|    |       |         |                                        |                                                               |                      |       |                                                                                       |                                                                                                                                 |                                                               |
|----|-------|---------|----------------------------------------|---------------------------------------------------------------|----------------------|-------|---------------------------------------------------------------------------------------|---------------------------------------------------------------------------------------------------------------------------------|---------------------------------------------------------------|
| 13 | 14.17 | Pos/Neg | -0.5 ppm<br>(99)<br>-0.6 ppm<br>(99)   | Kaempferol<br>tetraglycoside (2<br>glucose and 2<br>rhamnose) | $C_{39}H_{50}O_{24}$ | 0.2 % | 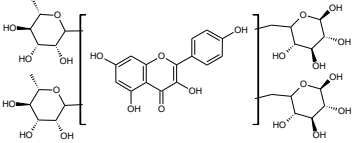   | Proposed compound from MS/MS<br>data. Connectivity unknown.                                                                     | 741.2040 (+)<br>595.16480<br>449.1074<br>287.0549<br>147.0439 |
| 14 | 14.64 | Pos/Neg | -0.2 ppm<br>(99)<br>-0.8 ppm<br>(100)  | Glucopyranosyl<br>rutin                                       | $C_{33}H_{40}O_{21}$ | 0.2 % |    | Proposed compound based on<br>MS/MS data.                                                                                       | 627.1558 (+)<br>611.1591<br>465.1032<br>303.0496<br>129.0552  |
|    |       | Pos/Neg | -0.5 ppm<br>(100)<br>-0.3 ppm<br>(100) | Astilbin<br>(29838-67-3)                                      | $C_{21}H_{22}O_{11}$ |       |   | Proposed based on MS/MS data.                                                                                                   | 289.0711 (+)<br>271.0603<br>243.0661<br>153.0181<br>149.0225  |
| 15 | 15.34 | Pos/Neg | -0.4 ppm<br>(100)<br>-1.2 ppm<br>(93)  | Kaempferol<br>rhamnosyl<br>glucoside                          | $C_{27}H_{30}O_{15}$ | 0.3 % |  | Proposed compound based on<br>MS/MS data and literature [17].<br>Observed as [M+ Formate] <sup>-</sup> in<br>negative ion mode. | 449.1081 (+)<br>287.0557<br>129.0546                          |



|    |       |         |                                           |                                             |                      |       |                                                                                       |                                                                 |                                                                                                 |
|----|-------|---------|-------------------------------------------|---------------------------------------------|----------------------|-------|---------------------------------------------------------------------------------------|-----------------------------------------------------------------|-------------------------------------------------------------------------------------------------|
| 16 | 16.30 | Pos/Neg | -0.1 ppm<br>(100)<br><br>-0.5 ppm<br>(99) | Bilobalide<br>(33570-04-6)                  | $C_{15}H_{18}O_8$    | 5.4 % | 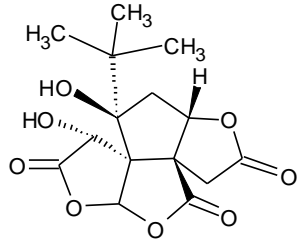   | RT, UV and MS/MS spectra<br>consistent with authentic standard. | 309.0974 (+)<br>245.0822<br>235.0961<br>217.0862<br>191.1068<br>173.0964<br>111.0803<br>57.0702 |
| 17 | 16.60 | Pos/Neg | -0.3 ppm<br>(100)<br><br>-0.9 ppm<br>(99) | Quercetin<br>rhamnosyl<br>rutinoside isomer | $C_{33}H_{40}O_{20}$ | 0.3 % |    | Proposed compound based on<br>MS/MS and literature [17].        | 611.1607 (+)<br>595.1657<br>465.1027<br>449.1078<br>303.0503<br>287.0551                        |
| 18 | 16.80 | Pos/Neg | -0.7 ppm<br>(100)<br><br>-0.1 ppm<br>(99) | Kaempferol di-<br>rhamnosyl-<br>glucoside   | $C_{33}H_{40}O_{19}$ | 0.9 % |  | Proposed structure based on<br>MS/MS and literature [18].       | 595.1657 (+)<br>449.1075<br>287.0552                                                            |

|    |       |         |                                      |                                             |                      |       |                                                                                      |                                                                     |                                                                          |
|----|-------|---------|--------------------------------------|---------------------------------------------|----------------------|-------|--------------------------------------------------------------------------------------|---------------------------------------------------------------------|--------------------------------------------------------------------------|
|    |       | Pos/Neg | 0.1 ppm<br>(100)<br>-0.2 ppm<br>(99) | Isorhamnetin di-<br>glucosyl-<br>rhamnoside | $C_{34}H_{42}O_{21}$ |       | 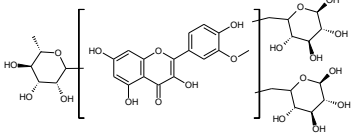  | Proposed structure based on<br>MS/MS.                               | 641.1715 (+)<br>625.1776<br>479.1185<br>317.0659                         |
| 19 | 17.18 | Neg     | -0.4 ppm<br>(100)                    | ?                                           | $C_{15}H_{20}O_9$    | 0.8 % | ?                                                                                    | This unknown one of several<br>analytes within this peak. *         | 299.1137 (-)<br>193.1234<br>181.1233<br>83.0502<br>72.9930               |
| 20 | 17.51 | Pos/Neg | -0.9 ppm<br>(99)<br>-0.9 ppm<br>(99) | Quercetin<br>rhamnosyl<br>rutinoside isomer | $C_{33}H_{40}O_{20}$ | 0.7 % |  | Proposed compound based on<br>MS/MS.                                | 611.1609 (+)<br>595.1652<br>465.1030<br>449.1079<br>303.0507<br>287.0554 |
|    |       | Pos/Neg | -0.8 ppm<br>(99)                     | Unknown                                     | $C_{27}H_{30}O_{15}$ |       | ?                                                                                    | MS/MS shows some indication of a<br>possible kaempferol rutinoside. | 285.0405 (-)<br>284.0326<br>151.0058                                     |

|    |       |         |                                           |                                                            |                      |       |                                                                                     |                                                                 |                                                                                              |
|----|-------|---------|-------------------------------------------|------------------------------------------------------------|----------------------|-------|-------------------------------------------------------------------------------------|-----------------------------------------------------------------|----------------------------------------------------------------------------------------------|
|    |       |         | -0.8 ppm<br>(100)                         |                                                            |                      |       |                                                                                     |                                                                 |                                                                                              |
|    |       | Pos/Neg | -0.2 ppm<br>(99)<br><br>-0.2 ppm<br>(99)  | Kaempferol<br>glucosyl-coumaryl-<br>glucosyl<br>rhamnoside | $C_{48}H_{56}O_{27}$ |       | 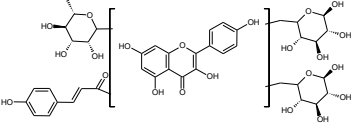 | MS/MS fragments indicate loss of coumaryl, rhamnose and hexose. | 901.2417 (-)<br><br>755.2047<br><br>609.1445<br><br>307.0822                                 |
| 21 | 17.86 | Pos/Neg | -0.4 ppm<br>(100)<br><br>-0.7 ppm<br>(99) | Myricetin rutinoside                                       | $C_{27}H_{30}O_{17}$ | 0.6 % |  | Proposed structure based on MS/MS and literature [17].          | 316.0224 (-)<br><br>178.9988                                                                 |
|    |       | Neg     | -0.1 ppm<br>(100)                         | Bilobalide isomer                                          | $C_{15}H_{18}O_8$    |       | ?                                                                                   | Probable isomer of Peak 16.                                     | 309.0977 (+)<br><br>245.0820<br><br>217.0863<br><br>191.1070<br><br>173.0961<br><br>111.0807 |

|    |       |         |                                            |                                             |                      |       |                                                                                       |                                                          |                                                                          |
|----|-------|---------|--------------------------------------------|---------------------------------------------|----------------------|-------|---------------------------------------------------------------------------------------|----------------------------------------------------------|--------------------------------------------------------------------------|
|    |       |         |                                            |                                             |                      |       |                                                                                       |                                                          | 57.0704                                                                  |
| 22 | 18.31 | Pos/Neg | -0.7 ppm<br>(99)<br><br>-0.6 ppm<br>(100)  | Quercetin<br>rhamnosyl<br>rutinoside isomer | $C_{33}H_{40}O_{20}$ | 0.9 % | 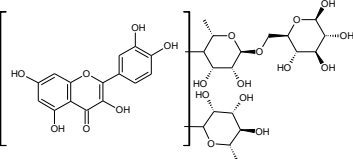   | Proposed compound based on<br>MS/MS and literature [17]. | 611.1607 (+)<br>595.1657<br>465.1027<br>449.1078<br>303.0503<br>287.0551 |
| 23 | 18.65 | Pos/Neg | -0.2 ppm<br>(100)<br><br>-0.8 ppm<br>(99)  | Quercetin<br>rhamnosyl<br>rutinoside isomer | $C_{33}H_{40}O_{20}$ | 0.5 % |    | Proposed compound based on<br>MS/MS and literature [17]. | 611.1609 (+)<br>595.1654<br>465.1025<br>449.1081<br>303.0502<br>287.0557 |
| 24 | 19.26 | Pos/Neg | -0.6 ppm<br>(100)<br><br>-0.6 ppm<br>(100) | Rutin isomer                                | $C_{27}H_{30}O_{16}$ | 1.4 % |  | Proposed compound based on<br>MS/MS and literature [17]. | 449.1080 (+)<br>287.05538<br>85.0282                                     |

|    |       |         |                                          |                                                |                      |       |                                                                                       |                                                                                                                   |                                                              |
|----|-------|---------|------------------------------------------|------------------------------------------------|----------------------|-------|---------------------------------------------------------------------------------------|-------------------------------------------------------------------------------------------------------------------|--------------------------------------------------------------|
| 25 | 19.51 | Pos/Neg | -0.6 ppm<br>(98)<br><br>-0.5 ppm<br>(99) | Ginkgolide J<br>(107438-79-9)                  | $C_{20}H_{24}O_{10}$ | 0.3 % | 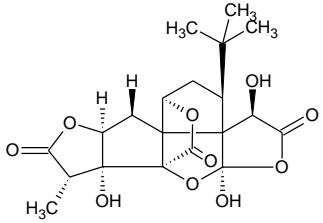   | RT, UV and MS/MS spectra consistent with authentic standard. Observed as [M+ Formate] in negative ion mode.       | 379.1387 (+)<br>351.1432<br>309.0606<br>235.0604<br>57.0699  |
| 26 | 19.72 | Pos/Neg | -0.1 ppm<br>(98)<br><br>-0.5 ppm<br>(98) | Quercetin glucosyl-coumarylglucosyl rhamnoside | $C_{42}H_{46}O_{23}$ | 0.7 % |    | Proposed structure based on MS/MS and literature [17].                                                            | 757.1964 (+)<br>611.1614<br>465.1028<br>309.0971<br>147.0439 |
| 27 | 19.78 | Pos/Neg | -0.7 ppm<br>(99)<br><br>-0.6 ppm<br>(99) | Kaempferol di-rhamnosyl-glucoside              | $C_{33}H_{40}O_{19}$ | 1.4 % |    | Proposed structure based on MS/MS. Kaempferol fragment ion observed in MS/MS.                                     | 595.1655 (+)<br>449.1074<br>287.0550<br>85.0285              |
| 28 | 20.12 | Pos/Neg | -2.8 ppm<br>(95)<br><br>-2.1 ppm<br>(97) | Rutin<br>(153-18-4)                            | $C_{27}H_{30}O_{16}$ | 5.5 % |  | RT, UV and MS/MS spectra consistent with authentic standard. Possible second isomer nearly coeluting with Ruti1n. | 465.1029 (+)<br>303.0507<br>129.0549<br>85.0288              |

|    |       |         |                   |                                 |                      |       |                                                                                       |                                                                                                                                                                     |                                                              |
|----|-------|---------|-------------------|---------------------------------|----------------------|-------|---------------------------------------------------------------------------------------|---------------------------------------------------------------------------------------------------------------------------------------------------------------------|--------------------------------------------------------------|
|    |       | Pos/Neg | -0.3 ppm<br>(97)  | Ginkgolide C<br>(15291-76-6)    | $C_{20}H_{24}O_{11}$ |       | 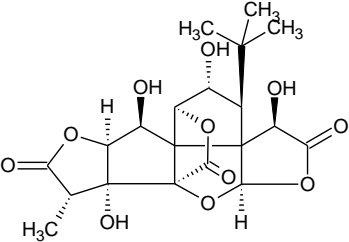   | RT, UV and MS/MS spectra consistent with authentic standard. Relative amounts of these two coeluting compounds probably not different by more than a factor of two. | 395.1345 (+)<br>377.1235<br>349.1281<br>325.0554<br>307.0451 |
| 29 | 20.50 | Pos/Neg | -0.3 ppm<br>(100) | Isoquercetin<br>(482-35-9)      | $C_{21}H_{20}O_{12}$ | 0.5 % |    | RT, UV and MS/MS spectra consistent with authentic standard.                                                                                                        | 301.0344 (-)<br>300.0275<br>271.0245<br>151.0034             |
|    |       | Pos/Neg | -0.7 ppm<br>(98)  |                                 |                      |       |                                                                                       |                                                                                                                                                                     |                                                              |
| 30 | 20.70 | Pos/Neg | -0.2 ppm<br>(100) | Laricitrin rutinoside<br>Isomer | $C_{28}H_{32}O_{17}$ | 0.6 % |  | Proposed structure based on MS source fragments, literature [17].                                                                                                   | 495.1134 (+)<br>333.0608<br>85.0284                          |
|    |       |         | -0.7 ppm<br>(99)  |                                 |                      |       |                                                                                       |                                                                                                                                                                     |                                                              |

|    |       |         |                   |                                                       |                      |       |                                                                                     |                                                                                                                                  |                                                              |
|----|-------|---------|-------------------|-------------------------------------------------------|----------------------|-------|-------------------------------------------------------------------------------------|----------------------------------------------------------------------------------------------------------------------------------|--------------------------------------------------------------|
| 31 | 20.97 | Pos/Neg | -0.4 ppm<br>(99)  | Kaempferol<br>glucosylcoumarylgl<br>ucosyl rhamnoside | $C_{42}H_{46}O_{22}$ | 0.2 % | 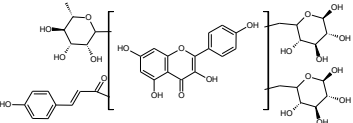 | Proposed structure based on<br>MS/MS and literature [17].                                                                        | 739.1881 (-)<br>593.1516<br>284.0324                         |
| 32 | 21.14 | Pos/Neg | -0.5 ppm<br>(99)  | Quercetin<br>glucosylcoumarylgl<br>ucosyl rhamnoside  | $C_{42}H_{46}O_{23}$ | 1.0 % |  | Proposed structure based on<br>MS/MS and literature [17].                                                                        | 755.1827 (-)<br>609.1459<br>301.0338<br>300.0274<br>178.9980 |
|    |       | Pos/Neg | -0.8 ppm<br>(98)  | Unknown                                               | $C_{26}H_{34}O_{11}$ |       | ?                                                                                   | Observed as $[M+NH_4]^+$ in positive<br>ion mode and $[M+Formate]^-$ in<br>negative ion mode. MS/MS<br>indicates hexose present. | 359.1507 (-)<br>341.1395<br>329.1395<br>44.9983              |
|    |       |         | -0.3 ppm<br>(99)  |                                                       |                      |       |                                                                                     |                                                                                                                                  |                                                              |
|    |       |         | -0.1 ppm<br>(100) |                                                       |                      |       |                                                                                     |                                                                                                                                  |                                                              |
|    |       |         | -0.4 ppm<br>(99)  |                                                       |                      |       |                                                                                     |                                                                                                                                  |                                                              |

|    |       |         |                                           |                                          |                      |       |                                                                                      |                                                                                                                                        |                                                             |
|----|-------|---------|-------------------------------------------|------------------------------------------|----------------------|-------|--------------------------------------------------------------------------------------|----------------------------------------------------------------------------------------------------------------------------------------|-------------------------------------------------------------|
| 33 | 22.09 | Pos/Neg | -0.7 ppm<br>(10)<br><br>-0.8 ppm<br>(99)  | Isomer of Rutin                          | $C_{27}H_{30}O_{16}$ | 1.3 % | 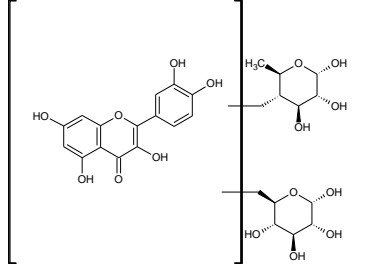  | Structure similar to Rutin based on similar MS/MS fragment ions observed from Rutin. MS/MS spectrum shows aglycone quercetin fragment. | 465.1031 (+)<br><br>303.0506                                |
| 34 | 22.20 | Pos/Neg | -0.4 ppm<br>(100)<br><br>-0.3 ppm<br>(98) | Kaempferol<br>rutinoside<br>(17650-84-9) | $C_{27}H_{30}O_{15}$ | 3.8 % |   | RT, UV and MS/MS spectra consistent with authentic standard.                                                                           | 449.1078 (+)<br><br>287.0554<br><br>129.0545<br><br>85.0285 |
| 35 | 22.63 | Pos/Neg | -0.4 ppm<br>(99)<br><br>-0.1 ppm<br>(100) | Quercitrin<br>(522-12-3)                 | $C_{21}H_{20}O_{11}$ | 0.2 % |  | RT, UV and MS/MS spectra consistent with authentic standard.                                                                           | 303.0506 (+)                                                |



|    |       |         |                                            |                                              |                      |       |                                                                                       |                                                                                                      |                                                              |
|----|-------|---------|--------------------------------------------|----------------------------------------------|----------------------|-------|---------------------------------------------------------------------------------------|------------------------------------------------------------------------------------------------------|--------------------------------------------------------------|
| 36 | 22.83 | Pos/Neg | -0.3 ppm<br>(99)<br><br>-0.6 ppm<br>(99)   | Isorhamnetin<br>rutinoside<br><br>(604-80-8) | $C_{28}H_{32}O_{16}$ | 3.2 % | 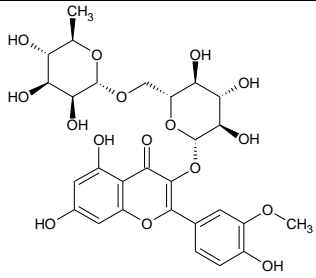   | RT, UV and MS/MS spectra<br>consistent with authentic standard.                                      | 315.0510 (-)<br><br>151.0029                                 |
| 37 | 23.16 | Pos/Neg | -0.3 ppm<br>(99)<br><br>-0.6 ppm<br>(99)   | Limocitrin<br>rutinoside<br><br>(489-33-8)   | $C_{29}H_{34}O_{17}$ | 0.5 % |    | Possibly Limocitrin (489-33-8)<br>rutinoside. MS/MS indicates<br>rutinoside and limocitrin aglycone. | 347.0762 (+)<br><br>85.0284                                  |
|    |       | Pos/Neg | -0.1 ppm<br>(100)<br><br>-0.5 ppm<br>(100) | Kaempferol<br>glucoside isomer               | $C_{21}H_{20}O_{11}$ |       | ?                                                                                     | MS/MS indicates presence of<br>hexose.                                                               | 287.0551 (+)<br><br>153.0184                                 |
|    |       | Pos/Neg | -0.1 ppm<br>(100)<br><br>-0.5 ppm<br>(100) | Myricetin<br><br>(529-44-2)                  | $C_{15}H_{10}O_8$    |       |  | RT, UV and MS/MS spectra<br>consistent with authentic standard.                                      | 178.9982 (-)<br><br>151.0033<br><br>137.0243<br><br>109.0294 |

|    |       |         |                   |                                          |                      |       |                                                                                     |                                                                                                                                                                                                |                                     |
|----|-------|---------|-------------------|------------------------------------------|----------------------|-------|-------------------------------------------------------------------------------------|------------------------------------------------------------------------------------------------------------------------------------------------------------------------------------------------|-------------------------------------|
|    |       |         |                   |                                          |                      |       |                                                                                     |                                                                                                                                                                                                | 107.0190                            |
| 38 | 23.38 | Pos/Neg | 0.1 ppm<br>(99)   | Genistein<br>rutinoside                  | $C_{27}H_{30}O_{14}$ | 1.8 % | 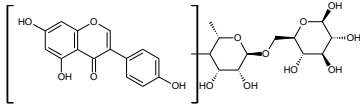 | MS/MS suggests genistein<br>aglycone, hexose and rhamnose<br>(cannot rule out apigenin as the<br>aglycone). This appears to be the<br>more abundant of the two similar<br>coeluting compounds. | 431.0986 (-)<br>268.0377            |
|    |       | Pos/Neg | -1.0 ppm<br>(97)  |                                          |                      |       |                                                                                     |                                                                                                                                                                                                |                                     |
|    |       | Pos/Neg | -0.4 ppm<br>(100) | Isorhamnetin<br>glucoside<br>(5041-82-7) | $C_{22}H_{22}O_{12}$ |       |  | RT, UV and MS/MS spectra<br>consistent with authentic standard.                                                                                                                                | 317.0659 (+)<br>209.1537            |
|    |       | Pos/Neg | -0.4 ppm<br>(100) |                                          |                      |       |                                                                                     |                                                                                                                                                                                                |                                     |
| 39 | 23.82 | Pos/Neg | 1.3 ppm<br>(98)   | Unknown                                  | $C_{28}H_{36}O_{13}$ | 0.9 % | ?                                                                                   | Observed as $[M+NH_4]^+$ in positive<br>ion mode. MS/MS indicates<br>presence of hexose.                                                                                                       | 535.2755(-)<br>417.1554<br>181.0503 |
|    |       |         | -3.7 ppm<br>(92)  |                                          |                      |       |                                                                                     |                                                                                                                                                                                                |                                     |
| 40 | 24.20 | Pos/Neg | -0.2 ppm          | Isomer of<br>Kaempferol                  | $C_{27}H_{30}O_{15}$ | 2.3 % |                                                                                     | MS/MS suggests hexose and<br>kaempferol aglycone.                                                                                                                                              | 433.1132 (+)<br>287.0553            |

|    |       |         |                                            |                                          |                      |       |                                                                                      |                                                                                                                                        |                                                              |
|----|-------|---------|--------------------------------------------|------------------------------------------|----------------------|-------|--------------------------------------------------------------------------------------|----------------------------------------------------------------------------------------------------------------------------------------|--------------------------------------------------------------|
|    |       |         | (100)<br><br>0.4 ppm<br>(99)               | rutinoside<br>(17650-84-9)               |                      |       | 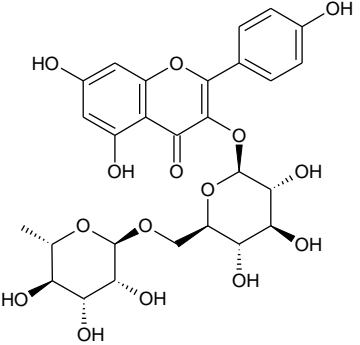  |                                                                                                                                        | 147.0649<br>129.0546<br>85.0285                              |
|    |       | Pos/Neg | -0.2 ppm<br>(100)<br><br>-0.5 ppm<br>(100) | Kaempferol<br>rutinoside<br>substructure | $C_{43}H_{46}O_{22}$ |       | ?                                                                                    | MS/MS data confirms substructure<br>of kaempferol rutinoside.<br>Remainder of formula corresponds<br>to epigallocatechin methyl ether. | 629.2055 (+)<br>611.1949<br>483.1508<br>287.0555<br>147.0442 |
| 41 | 24.75 | Pos/Neg | -0.5 ppm<br>(100)<br><br>-0.5 ppm<br>(100) | Isomer of<br>Quercitrin<br>(522-12-3)    | $C_{21}H_{20}O_{11}$ | 0.8 % |  | MS/MS confirms quercetin<br>aglycone and rhamnose.                                                                                     | 303.0509 (+)                                                 |
|    |       | Pos/Neg | -0.4 ppm<br>(99)                           | Unknown                                  | $C_{26}H_{34}O_{10}$ |       | ?                                                                                    | Observed as $[M+NH_4]^+$ in positive<br>ion mode and $[M+Formate]^-$ in<br>negative ion mode.                                          | 521.2032 (-)<br>503.1925                                     |

|    |       |         |                                           |                          |                      |       |                                                                                     |                                                                                                                |                                                              |
|----|-------|---------|-------------------------------------------|--------------------------|----------------------|-------|-------------------------------------------------------------------------------------|----------------------------------------------------------------------------------------------------------------|--------------------------------------------------------------|
|    |       |         | -0.5 ppm<br>(100)                         |                          |                      |       |                                                                                     |                                                                                                                | 491.1922                                                     |
| 42 | 24.82 | Pos/Neg | -0.4 ppm<br>(99)<br><br>-0.5 ppm<br>(100) | Unknown                  | $C_{32}H_{42}O_{14}$ | 0.3 % | ?                                                                                   | This empirical formula is confident, but MS/MS does not clarify structure.                                     | 621.2560 (+)<br>456.2129<br>426.2025<br>382.2122<br>259.1442 |
| 43 | 25.21 | Pos/Neg | -1.2 ppm<br>(81)<br><br>-5.4 ppm<br>(70)  | Kaempferol<br>rhamnoside | $C_{21}H_{20}O_{10}$ | 0.3 % | 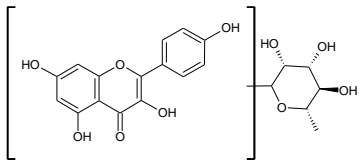 | MS/MS confirms kaempferol aglycone and rhamnose.                                                               | 285.0399 (-)<br>284.0327<br>255.0301<br>227.0346             |
|    |       | Pos/Neg | -0.1 ppm<br>(99)<br><br>-0.4 ppm<br>(100) | Unknown                  | $C_{20}H_{36}O_{11}$ |       | ?                                                                                   | Observed as $[M+NH_4]^+$ in positive ion mode and $[M+Formate]^-$ in negative ion mode. MS/MS confirms hexose. | 451.2187 (-)<br>289.1649<br>161.0452<br>101.0241<br>71.0144  |

|    |       |         |                                           |                                                    |                      |       |                                                                                      |                                                                                                                                                                                        |                                                              |
|----|-------|---------|-------------------------------------------|----------------------------------------------------|----------------------|-------|--------------------------------------------------------------------------------------|----------------------------------------------------------------------------------------------------------------------------------------------------------------------------------------|--------------------------------------------------------------|
| 44 | 25.44 | Pos/Neg | -1.0 ppm<br>(98)<br><br>0.6 ppm<br>(99)   | Ginkgolide<br>Isomer                               | $C_{20}H_{24}O_{10}$ | 0.4 % | 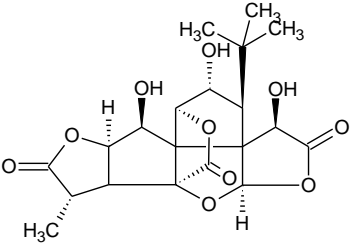  | Possibly Ginkgolide M. Also observed as $[M+NH_4]^+$ in positive ion mode and $[M+ Formate]^-$ in negative ion mode. MS/MS spectrum similar to that of isobaric Ginkgolide B (Peak 46) | 361.1302(+)<br>343.1157<br>305.1021<br>275.0926<br>113.0976  |
| 45 | 25.85 | Pos/Neg | -0.5 ppm<br>(99)<br><br>-0.2 ppm<br>(99)  | Quercetin<br>coumarylglucosyl<br>rhamnoside isomer | $C_{36}H_{36}O_{18}$ | 4.1 % |   | Assignment based on literature [17] and MS/MS in negative ion mode. MS/MS suggests coumaryl group, rutoside and quercetin.                                                             | 609.1465(-)<br>300.0274<br>178.9982                          |
| 46 | 26.02 | Pos/Neg | -1.1 ppm<br>(98)<br><br>-0.1 ppm<br>(100) | Ginkgolide A<br>(15291-75-5)                       | $C_{20}H_{24}O_9$    | 9.3 % |  | RT, UV and MS/MS spectra consistent with authentic standard. Also observed as $[M+NH_4]^+$ in positive ion mode and $[M+ Formate]^-$ in negative ion mode.                             | 363.1436 (+)<br>345.1334<br>327.1226<br>299.1279<br>249.0757 |

|    |       |         |                                          |                              |                      |       |                                                                                       |                                                                                                                                                           |                                                              |
|----|-------|---------|------------------------------------------|------------------------------|----------------------|-------|---------------------------------------------------------------------------------------|-----------------------------------------------------------------------------------------------------------------------------------------------------------|--------------------------------------------------------------|
|    |       | Pos/Neg | 0.2 ppm<br>(100)<br><br>-1.5 ppm<br>(99) | Ginkgolide B<br>(15291-77-7) | $C_{20}H_{24}O_{10}$ |       | 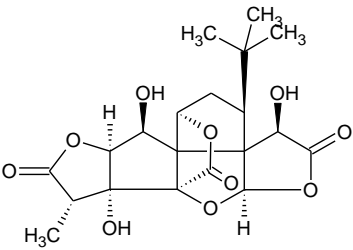   | RT, UV and MS/MS spectra consistent with authentic standard. Also observed as $[M+NH_4]^+$ in positive ion mode and $[M+Formate]^-$ in negative ion mode. | 361.1280 (+)<br>343.1179<br>305.1018<br>257.0810<br>113.0959 |
| 47 | 26.41 | Pos/Neg | -1.0 ppm<br>(99)<br><br>-0.7 ppm<br>(96) | Unknown                      | $C_{21}H_{30}O_9$    | 0.8 % | ?                                                                                     | Observed as $[M+NH_4]^+$ in positive ion mode and $[M+Formate]^-$ in negative ion mode. MS/MS indicates hexose.                                           | 245.1184 (-)<br>179.0559<br>119.0648<br>89.0245<br>59.0139   |
| 48 | 26.57 | Pos     | -0.8 ppm<br>(100)                        | Unknown                      | $C_{19}H_{22}O_5$    | 0.9 % | ?                                                                                     | MS/MS shows facile loss of formic acid.                                                                                                                   | 313.1418 (+)<br>285.1120<br>255.1064<br>151.0751<br>137.0595 |
| 49 | 27.71 | Pos/Neg | -1.1 ppm<br>(99)<br><br>0.1 ppm          | Quercetin<br>(117-39-5)      | $C_{15}H_{10}O_7$    | 7.0 % |  | RT, UV and MS/MS spectra consistent with authentic standard.                                                                                              | 273.0403 (-)<br>178.9983<br>151.0033<br>121.0294             |

|    |       |         |                                       |                                                                   |                      |       |                                                                                     |                                                                                                                                                                                                                                                                     |                                                               |
|----|-------|---------|---------------------------------------|-------------------------------------------------------------------|----------------------|-------|-------------------------------------------------------------------------------------|---------------------------------------------------------------------------------------------------------------------------------------------------------------------------------------------------------------------------------------------------------------------|---------------------------------------------------------------|
|    |       |         | (100)                                 |                                                                   |                      |       |                                                                                     |                                                                                                                                                                                                                                                                     | 107.0139                                                      |
| 50 | 27.78 | Pos/Neg | -0.4 ppm<br>(100)<br>-0.6 ppm<br>(99) | Kaempferol<br>coumarylglucosyl<br>rhamnoside isomer               | $C_{36}H_{36}O_{17}$ | 2.8 % | 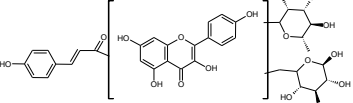 | MS/MS confirms coumaryl,<br>rhamnosyl hexosyl and kaempferol<br>aglycone. Assignment also based<br>on literature [17].                                                                                                                                              | 579.1517 (+)<br>433.1132<br>309.0969<br>287.0551<br>147.0440  |
| 51 | 28.61 | Pos/Neg | -0.9 ppm<br>(100)<br>-0.6 ppm<br>(70) | Quercetin<br>coumarylglucosyl<br>rhamnoside isomer                | $C_{36}H_{36}O_{18}$ | 0.9 % |  | MS/MS confirms coumaryl,<br>rhamnosyl hexosyl and quercetin<br>aglycone. Assignment also based<br>on literature [17].                                                                                                                                               | 609.1462(-)<br>300.0278<br>178.9981                           |
| 52 | 29.20 | Pos/Neg | 0.3 ppm<br>(99)<br>0.7 ppm<br>(99)    | Kaempferol-<br>quercetin<br>coumarylglucosyl<br>rhamnoside isomer | $C_{72}H_{72}O_{35}$ | 0.8 % | Unknown combination of<br>Peaks 50 and 51.                                          | Appears to be chromatographically<br>distinct dimer of MW = 740 and<br>MW = 756 compound (Peaks 50<br>and 51). Observe doubly charged<br>ion in both negative and positive<br>ion modes. MS/MS confirms<br>kaempferol and quercetin<br>aglycones, rhamnose, glucose | 1209.3260 (-)<br>901.2158<br>755.1821<br>609.1455<br>300.0271 |
| 53 | 29.55 | Neg     | -0.6 ppm<br>(100)                     | Unknown                                                           | $C_{21}H_{34}O_9$    | 0.2 % | ?                                                                                   | Proposed elemental formula based<br>on negative ion data. MS/MS<br>indicates hexose.                                                                                                                                                                                | 249.1489 (-)<br>205.1603                                      |

|    |       |         |                                       |                                                                   |                      |       |                                            |                                                                                                                                                                                                                                                                     |                                                                |
|----|-------|---------|---------------------------------------|-------------------------------------------------------------------|----------------------|-------|--------------------------------------------|---------------------------------------------------------------------------------------------------------------------------------------------------------------------------------------------------------------------------------------------------------------------|----------------------------------------------------------------|
|    |       |         |                                       |                                                                   |                      |       |                                            |                                                                                                                                                                                                                                                                     | 179.0557<br>101.0245<br>89.0240                                |
| 54 | 29.78 | Pos/Neg | 0.2 ppm<br>(99)<br>-0.7 ppm<br>(100)  | Kaempferol-<br>quercetin<br>coumarylglucosyl<br>rhamnoside isomer | $C_{72}H_{72}O_{35}$ | 0.9 % | Unknown combination of<br>Peaks 50 and 51. | Appears to be chromatographically<br>distinct dimer of MW = 740 and<br>MW = 756 compound (Peaks 50<br>and 51). Observe doubly charged<br>ion in both negative and positive<br>ion modes. MS/MS confirms<br>kaempferol and quercetin<br>aglycones, rhamnose, glucose | 1209.3280 (-)<br>901.2191<br>755.1849<br>609.1455<br>300.0265  |
| 55 | 29.90 | Pos/Neg | 0.3 ppm<br>(100)<br>-0.5 ppm<br>(100) | Kaempferol-<br>quercetin<br>coumarylglucosyl<br>rhamnoside isomer | $C_{72}H_{72}O_{35}$ | 0.9 % | Unknown combination of<br>Peaks 50 and 51. | Appears to be chromatographically<br>distinct dimer of MW = 740 and<br>MW = 756 compound (Peaks 50<br>and 51). Observe doubly charged<br>ion in both negative and positive<br>ion modes. MS/MS confirms<br>kaempferol and quercetin<br>aglycones, rhamnose, glucose | 1209.3316 (-)<br>901.2190<br>755.1831<br>609.1471<br>300.0288  |
| 56 | 30.36 | Pos/Neg | -0.3 ppm<br>(100)<br>-0.6 ppm<br>(94) | Kaempferol<br>coumarylglucosyl<br>rhamnoside isomer<br>dimer      | $C_{72}H_{72}O_{34}$ | 0.8 % | Unknown dimer of Peak 50.                  | Appears to be chromatographically<br>distinct dimer of MW = 740 (Peak<br>50). Observe doubly charged ion in<br>both negative and positive ion<br>modes. MS/MS confirms<br>kaempferol aglycone, rhamnose,<br>hexose.                                                 | 1267.2979 (-)<br>1193.3358<br>981.2527<br>593.1520<br>285.0407 |



|    |       |         |                                        |                                                              |                      |       |                                                                                       |                                                                                                                                                                                                                     |                                                               |
|----|-------|---------|----------------------------------------|--------------------------------------------------------------|----------------------|-------|---------------------------------------------------------------------------------------|---------------------------------------------------------------------------------------------------------------------------------------------------------------------------------------------------------------------|---------------------------------------------------------------|
| 57 | 30.49 | Pos/Neg | -0.8 ppm<br>(100)<br>-0.4 ppm<br>(100) | Kaempferol<br>coumarylglucosyl<br>rhamnoside isomer          | $C_{36}H_{36}O_{17}$ | 0.6 % | 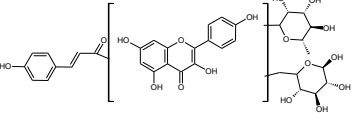   | MS/MS confirms coumaryl,<br>rhamnosyl hexosyl and kaempferol<br>aglycone. Assignment also based<br>on literature [17].                                                                                              | 593.1519 (-)<br>413.0881<br>284.0330<br>145.0297              |
| 58 | 30.79 | Pos/Neg | -0.6 ppm<br>(100)<br>-0.5 ppm<br>(100) | Genistein<br>(446-72-0)                                      | $C_{15}H_{10}O_5$    | 1.5 % |    | RT, UV and MS/MS spectra<br>consistent with authentic standard.                                                                                                                                                     | 243.0654 (+)<br>215.0705<br>197.0599<br>153.0182<br>91.0545   |
| 59 | 31.23 | Pos/Neg | -0.1 ppm<br>(100)<br>-0.5 ppm<br>(100) | Kaempferol<br>coumarylglucosyl<br>rhamnoside isomer<br>dimer | $C_{72}H_{72}O_{34}$ | 0.2 % | Unknown dimer of Peak 50.                                                             | Appears to be chromatographically<br>distinct dimer of MW = 740 (Peak<br>50). Observe doubly charged ion in<br>both negative and positive ion<br>modes. MS/MS confirms<br>kaempferol aglycone, rhamnose,<br>hexose. | 1193.3378 (-)<br>981.2531<br>739.1896<br>593.1533<br>285.0406 |
| 60 | 31.81 | Pos/Neg | -0.9 ppm<br>(100)<br>-0.4 ppm<br>(100) | Kaempferol<br>(520-18-3)                                     | $C_{15}H_{10}O_6$    | 3.6 % |  | RT, UV and MS/MS spectra<br>consistent with authentic standard.                                                                                                                                                     | 258.0524 (+)<br>213.0542<br>153.0180<br>121.0285<br>68.9969   |

|    |       |         |                                        |                                                              |                      |       |                                                                                     |                                                                                                                                                                                                                     |                                                                |
|----|-------|---------|----------------------------------------|--------------------------------------------------------------|----------------------|-------|-------------------------------------------------------------------------------------|---------------------------------------------------------------------------------------------------------------------------------------------------------------------------------------------------------------------|----------------------------------------------------------------|
| 61 | 32.50 | Pos/Neg | 0.3 ppm<br>(99)<br>-0.3 ppm<br>(97)    | Kaempferol<br>coumarylglucosyl<br>rhamnoside isomer<br>dimer | $C_{72}H_{72}O_{34}$ | 0.3 % | Unknown dimer of Peak 50.                                                           | Chromatographically distinct dimer<br>of MW = 740 (Peak 50). Observe<br>doubly charged ion in both<br>negative and positive ion modes.<br>MS/MS confirms kaempferol<br>aglycone, rhamnose, hexose.                  | 1193.3355 (-)<br>739.1892<br>593.1507<br>285.0395              |
| 62 | 32.82 | Pos/Neg | -0.2 ppm<br>(100)<br>-0.3 ppm<br>(100) | Isorhamnetin<br>(480-19-3)                                   | $C_{16}H_{12}O_7$    | 0.4 % | 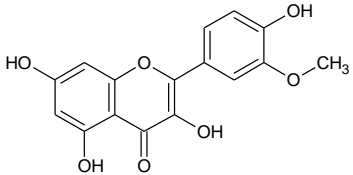 | RT, UV and MS/MS spectra<br>consistent with authentic standard.                                                                                                                                                     | 302.0421 (+)<br>274.0469<br>229.0490<br>153.0180<br>93.0332    |
|    |       | Pos/Neg | 0.2 ppm<br>(100)<br>-0.3 ppm<br>(100)  | Kaempferol<br>coumarylglucosyl<br>rhamnoside isomer<br>dimer | $C_{72}H_{72}O_{34}$ |       | Unknown dimer of Peak 50.                                                           | Appears to be chromatographically<br>distinct dimer of MW = 740 (Peak<br>50). Observe doubly charged ion in<br>both negative and positive ion<br>modes. MS/MS confirms<br>kaempferol aglycone, rhamnose,<br>hexose. | 1267.3015 (-)<br>1193.3355<br>981.2521<br>593.1516<br>285.0396 |
|    |       | Pos/Neg | -0.3 ppm<br>(94)<br>-1.0 ppm           | Unknown                                                      | $C_{21}H_{32}O_8$    |       | ?                                                                                   | Observed as $[M+NH_4]^+$ in positive<br>ion mode and $[M+Formate]^-$ in<br>negative ion mode.                                                                                                                       | 231.1374 (-)<br>161.0449<br>113.0246<br>101.0244               |

|    |       |         |                                            |                                     |                                                 |       |                                                                                       |                                                                                                                                                                |                                                                                   |
|----|-------|---------|--------------------------------------------|-------------------------------------|-------------------------------------------------|-------|---------------------------------------------------------------------------------------|----------------------------------------------------------------------------------------------------------------------------------------------------------------|-----------------------------------------------------------------------------------|
|    |       |         | (98)                                       |                                     |                                                 |       |                                                                                       |                                                                                                                                                                | 89.0244                                                                           |
| 63 | 38.28 | Pos/Neg | -0.5 ppm<br>(100)<br><br>-0.1 ppm<br>(100) | Unknown                             | C <sub>16</sub> H <sub>32</sub> O <sub>4</sub>  | 0.3 % | ?                                                                                     | Water loss fragment in positive ion mode suggest hydroxylated C16 chain acid.                                                                                  | 269.2116 (-)<br>241.2714<br>141.1285<br>99.0816                                   |
| 64 | 40.60 | Pos/Neg | -0.6 ppm<br>(97)<br><br>-0.6 ppm<br>(99)   | Unknown                             | C <sub>48</sub> H <sub>76</sub> O <sub>18</sub> | 0.5 % | ?                                                                                     | Observe [M+NH <sub>4</sub> ] <sup>+</sup> in positive ion mode. DBE = 11. Appears to be triterpenoid saponin related structure. Possibly Dehydrosoyasaponin I. | 731.4362 (-)<br>613.3739<br>523.3786<br>205.0713<br>163.0609                      |
| 65 | 42.85 | Pos     | -0.7 ppm<br>(90)                           | Unknown                             | C <sub>15</sub> H <sub>22</sub> O <sub>3</sub>  | 0.1 % | ?                                                                                     | MS/MS response too weak. No MS/MS fragments.                                                                                                                   |                                                                                   |
| 66 | 43.40 | Pos     | -1.0 ppm<br>(100)                          | (Z)-Alpha-Atlantone<br>(56192-70-2) | C <sub>15</sub> H <sub>22</sub> O <sub>1</sub>  | 0.1 % | 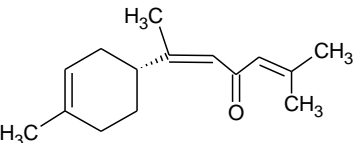 | Proposed compound based on literature references and consistent with MS/MS spectrum.                                                                           | 177.1267 (+)<br>151.1116<br>109.0646<br>85.0649<br>57.0699                        |
|    |       | Pos/Neg | 0.7 ppm                                    | Unknown                             | C <sub>47</sub> H <sub>74</sub> O <sub>17</sub> |       |                                                                                       | ?                                                                                                                                                              | Observed as [M+NH <sub>4</sub> ] <sup>+</sup> in positive ion mode. Appears to be |

|    |       |         |                                       |                               |                      |       |                                                                                      |                                                                                                                   |                                                              |
|----|-------|---------|---------------------------------------|-------------------------------|----------------------|-------|--------------------------------------------------------------------------------------|-------------------------------------------------------------------------------------------------------------------|--------------------------------------------------------------|
|    |       |         | (91)<br>-0.3 ppm<br>(99)              |                               |                      |       |                                                                                      | triterpenoid saponin related structure.                                                                           | 569.3833<br>523.3793<br>455.3543<br>143.0348<br>131.0244     |
| 67 | 44.27 | Pos/Neg | -0.6 ppm<br>(82)<br>-0.4 ppm<br>(96)  | Unknown                       | $C_{21}H_{40}O_7$    |       | ?                                                                                    | Also observed $[M+Na]^+$ and $[M+NH_4]^+$ in positive ion mode and observed $[M+Formate]^-$ in negative ion mode. | 387.2721 (+)<br>327.2528<br>309.2405<br>235.2062<br>217.1953 |
| 68 | 44.92 | Pos/Neg | -0.5 ppm<br>(100)<br>-0.8 ppm<br>(99) | Soyasaponin I<br>(51330-27-9) | $C_{48}H_{78}O_{18}$ | 0.2 % | 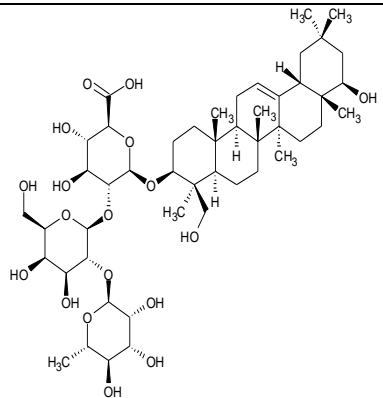 | RT, UV and MS/MS spectra consistent with authentic standard.                                                      | 733.4554 (-)<br>615.3903<br>525.3946<br>205.0715<br>163.0612 |
| 69 | 45.86 | Pos/Neg | -0.8 ppm<br>(99)                      | Unknown                       | $C_{42}H_{68}O_{14}$ | 0.1 % | ?                                                                                    | Similar structure to Peak 68 based on MS/MS. Appears to be triterpenoid saponin related                           | 615.3904 (-)<br>457.3709                                     |

|    |       |         |                                            |                                  |                      |       |                      |                                                                                                                                      |                                                              |
|----|-------|---------|--------------------------------------------|----------------------------------|----------------------|-------|----------------------|--------------------------------------------------------------------------------------------------------------------------------------|--------------------------------------------------------------|
|    |       |         | -0.7 ppm<br>(99)                           |                                  |                      |       |                      | structure.                                                                                                                           | 157.0138<br>101.0244<br>89.0244                              |
| 70 | 46.23 | Pos/Neg | -0.8 ppm<br>(99)<br><br>-0.6 ppm<br>(99)   | Unknown                          | $C_{42}H_{68}O_{14}$ | 0.3 % | ?                    | Similar structure to Peak 69 based on MS/MS. Appears to be triterpenoid saponin related structure.                                   | 615.3957 (-)<br>457.3705<br>157.0146<br>101.0245<br>89.0246  |
| 71 | 46.78 | Pos/Neg | -0.4 ppm<br>(99)<br><br>-0.6 ppm<br>(100)  | Unknown                          | $C_{48}H_{78}O_{17}$ | 0.4 % | ?                    | Observe $[M+NH_4]^+$ in positive ion mode. DBE = 10. Appears to be triterpenoid saponin related structure.                           | 717.4597 (-)<br>599.3963<br>509.3993<br>205.0711<br>163.0606 |
| 72 | 47.22 | Pos/Neg | -0.8 ppm<br>(100)<br><br>-0.7 ppm<br>(100) | Trihydroxy-<br>octadecenoic acid | $C_{18}H_{34}O_5$    | 0.2 % | Connectivity unknown | MS/MS clearly suggests presence of acetate and three aliphatic hydroxyl groups. Position of hydroxyl groups and double bond unknown. | 287.2225 (-)<br>269.2120<br>59.0140                          |
| 73 | 48.37 | Pos/Neg | -0.6 ppm                                   | Unknown                          | $C_{42}H_{68}O_{13}$ | 0.2 % | ?                    | Observe $[M+NH_4]^+$ in positive ion mode. Appears to be triterpenoid                                                                | 599.3955 (-)                                                 |

|    |       |         |                                        |         |                      |       |   |                                                                                      |                                                             |
|----|-------|---------|----------------------------------------|---------|----------------------|-------|---|--------------------------------------------------------------------------------------|-------------------------------------------------------------|
|    |       |         | (100)<br>-0.8 ppm<br>(100)             |         |                      |       |   | saponin related structure.                                                           | 509.4005<br>439.3582<br>113.0246<br>101.0245                |
| 74 | 52.68 | Pos/Neg | -0.6 ppm<br>(100)<br>-0.4 ppm<br>(100) | Unknown | $C_{25}H_{40}O_5$    | 0.2 % | ? | MS/MS suggests coumaryl group and dihydroxy aliphatic C16 acid.                      | 163.0399 (-)<br>145.0293<br>119.0500<br>93.0349             |
| 75 | 54.62 | Pos/Neg | -0.8 ppm<br>(98)<br>-0.8 ppm<br>(100)  | Unknown | $C_{33}H_{56}O_{14}$ | 0.3 % | ? | Observe $[M+NH_4]^+$ in positive ion mode and $[M+ Formate]^-$ in negative ion mode. | 415.1457 (-)<br>397.1354<br>277.2177<br>235.0821<br>89.0245 |
| 76 | 71.03 | Pos     | -2.9 ppm<br>(97)                       | Unknown | $C_{18}H_{30}O_2$    | 0.1 % | ? | MS/MS suggests dihydroxy-aliphatic C18 chain.                                        | 261.2213 (+)<br>243.2106                                    |
| 77 | 73.79 | Pos     | -2.1 ppm<br>(97)                       | Unknown | $C_{30}H_{48}O_1$    | 0.2 % | ? | Possible triterpene compound with single hydroxyl group. Very weak. MS/MS signal.    | 407.3676 (+)                                                |
| 78 | 75.84 | Pos     | -1.0 ppm                               | Unknown | $C_{18}H_{32}O_2$    | 0.1 % | ? | Low Score caused by mass interferences and low signal.                               |                                                             |

|    |            |                     |                                           |                                           |                                                |       |                                                                                     |                                                                 |                                                  |
|----|------------|---------------------|-------------------------------------------|-------------------------------------------|------------------------------------------------|-------|-------------------------------------------------------------------------------------|-----------------------------------------------------------------|--------------------------------------------------|
|    |            |                     | (48)                                      |                                           |                                                |       |                                                                                     | Signal too weak for MS/MS.<br>Possibly Linoleic acid.           |                                                  |
| 79 | 80.04      | Not<br>Detecte<br>d | N/A                                       | Unknown                                   | Unknown                                        | 0.3 % | ?                                                                                   | No discernable MS signal obtained<br>for CAD peak.              |                                                  |
| 80 | 83.27      | Pos/Neg             | -0.7 ppm<br>(92)<br><br>-0.2 ppm<br>(99)  | Ginkgolic Acid<br>(C13:0)<br>(20261-38-5) | C <sub>20</sub> H <sub>32</sub> O <sub>3</sub> | 0.3 % | 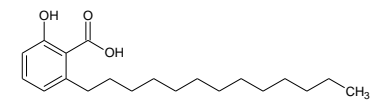 | RT, UV and MS/MS spectra<br>consistent with authentic standard. | 275.2382 (-)<br>119.0502<br>106.0425             |
| 81 | 84.40      | Pos/Neg             | -0.9 ppm<br>(97)<br><br>-0.3 ppm<br>(100) | Ginkgolic Acid<br>(C15:1)<br>(22190-60-7) | C <sub>22</sub> H <sub>34</sub> O <sub>3</sub> | 0.6 % |  | RT, UV and MS/MS spectra<br>consistent with authentic standard. | 301.2539 (-)<br>173.0662<br>119.0505<br>106.0427 |
| 82 | 87.57      | Not<br>Detecte<br>d | N/A                                       | Unknown                                   | Unknown                                        | 0.3 % | ?                                                                                   | No discernable MS signal obtained<br>for CAD peak.              |                                                  |
| 83 | 105.7<br>2 | Not<br>Detecte<br>d | N/A                                       | Unknown                                   | Unknown                                        | 0.1 % | ?                                                                                   | No discernable MS signal obtained<br>for CAD peak.              |                                                  |

\* Mass Spectra from these CAD peaks also contained other lower level signals that indicate the presence of other analytes not reported.

**Table S2** Additional Instrumental Conditions. All values as indication by the instrument

ESI (Agilent 6540)

- Capillary voltage – 4000 V
- Nozzle Voltage – 2000 V
- N<sub>2</sub> Drying Gas temperature – 350 °C
- Vaporizer Sheath Gas Temperature – 295 °C
- Nebulizer - 20 psig N<sub>2</sub>
- Sheath Gas -12 L N<sub>2</sub>/min
- Drying Gas – 5 L N<sub>2</sub>/min
- Mass Range – m/z 50-1700, 2 scans/second

APCI

- Capillary voltage – 3500 V
- N<sub>2</sub> Drying Gas temperature – 350 °C
- APCI Vaporizer Temperature – 450 °C
- Nebulizer - 60 psig N<sub>2</sub>
- Drying Gas – 5 L N<sub>2</sub>/min

CAD

- Corona Current 4000 nA
- Gas – N<sub>2</sub> 35 psi. Range – 100 pA. Data collection rate -10 Hz
- 

Fragmentation collision energy was optimized for each compound within the range of 8-50 eV
